## RESEARCH ARTICLE

# Growth responses of eight wetland species to water level fluctuation with different ranges and frequencies

Guan-Wen Wei<sup>1</sup>, Yue Chen<sup>1</sup>, Xin-Sheng Sun<sup>1</sup>, Yu-Han Chen<sup>1</sup>, Fang-Li Luo<sup>1\*</sup>, Fei-Hai Yu<sup>1,2</sup>

**1** School of Nature Conservation, Beijing Forestry University, Beijing, China, **2** Institute of Wetland Ecology & Clone Ecology, Zhejiang Provincial Key Laboratory of Plant Evolutionary Ecology and Conservation, Taizhou University, Taizhou, Zhejiang, China

\* [ecoluofangli@bjfu.edu.cn](mailto:ecoluofangli@bjfu.edu.cn)

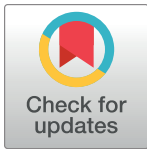

## OPEN ACCESS

**Citation:** Wei G-W, Chen Y, Sun X-S, Chen Y-H, Luo F-L, Yu F-H (2019) Growth responses of eight wetland species to water level fluctuation with different ranges and frequencies. PLoS ONE 14(7): e0220231. <https://doi.org/10.1371/journal.pone.0220231>

**Editor:** Jian Liu, Shandong University, CHINA

**Received:** May 15, 2019

**Accepted:** July 11, 2019

**Published:** July 25, 2019

**Copyright:** © 2019 Wei et al. This is an open access article distributed under the terms of the [Creative Commons Attribution License](https://creativecommons.org/licenses/by/4.0/), which permits unrestricted use, distribution, and reproduction in any medium, provided the original author and source are credited.

**Data Availability Statement:** All relevant data are within the paper and its Supporting Information files.

**Funding:** This research was supported by the National Key R&D Program of China (2017YFC0505903, FLL), the Fundamental Research Funds for the Central Universities (2015ZCQ-BH-01, FHY) and the National Science Foundation of China (31670428, FLL). The funders had no role in study design, data collection and analysis, decision to publish, or preparation of the manuscript.

## Abstract

Fluctuation range and frequency are two important components of water level fluctuation, but their effects on wetland plants have not been evaluated separately. We subjected eight wetland species to a control treatment with static water level and fluctuation treatments with different ranges or frequencies to examine their effects on plant growth. *Acorus calamus*, *Butomus umbellatus* and *Iris wilsonii* showed high survival rates in all treatments with various fluctuation ranges and frequencies. Their survival rates were higher at the medium fluctuation frequency than at the low and high frequencies, suggesting beneficial effects of the medium frequency. In the experiment comparing the fluctuation ranges, *A. calamus* and *I. wilsonii* could maintain the capacity for asexual propagation and accumulate higher biomass compared with the control plants, while biomass of the other six species dramatically decreased. In the experiment comparing fluctuation frequency, species with relatively high survival rates ( $\geq 50\%$ ) maintained or increased the capacity of asexual propagation, and *A. calamus* and *I. wilsonii* allocated relatively more biomass to roots, which may enhance plant growth and survival. In contrast, these species did not show increased biomass allocation to shoots in response to both fluctuation range and frequency, presumably because shoots are prone to mechanical damage caused by streaming floodwater. Taken together, biomass accumulation in roots rather than in shoots and the ability to asexually propagate are important for the survival of these species during water fluctuation.

## Introduction

Water level fluctuation is a major component of hydrological regimes, which is a common and crucial process encountered by wetland plants [1–2]. Frequent submergence and de-submergence during water fluctuation result in great variations in the availability of light, O<sub>2</sub> and CO<sub>2</sub> for plants [3–5]. Also, wave disturbance during water level fluctuation can impose mechanical damage to wetland plants [6–9]. Furthermore, water level fluctuation can lead to sediment

**Competing interests:** The authors have declared that no competing interests exist.

resuspension and strongly decrease concentrations of soil nutrients in wetlands [10–11]. As a result, water fluctuation has strong impacts on plant growth and distribution [12–13]. Former studies have shown that moderate levels of water fluctuation could promote seed germination and seedling establishment, while intensive fluctuation could greatly restrict plant growth and distribution [14].

Water level fluctuation has two important components: fluctuation range and frequency [15–16]. The range of fluctuation refers to the difference between the lowest and the highest water level during a fluctuation cycle, and the frequency of fluctuation is defined by the number of fluctuation cycles (e.g. a cycle going from the lowest to the highest water level and then to the lowest again) within a certain period. Global climate change is predicted to increase the frequency of extreme precipitation events in most temperate regions [17]. Consequently, hydrological interactions between water body and the surrounding regions may be altered significantly, leading to the occurrence of more frequent water fluctuation affecting greater areas of wetlands [9, 18–20]. To develop strategies for wetland management in the face of such climate scenario, it is necessary to assess the effects of different ranges and frequencies of water level fluctuation on growth of wetland plants.

Plants subjected to larger fluctuation range experience lower O<sub>2</sub> and light intensity, but higher CO<sub>2</sub> and hydrostatic pressure [21–22]. Till now, many studies have focused on response of wetland plants to constant water depth, but not to different fluctuation ranges [23–26]. A few studies on plant response to fluctuation range have shown that wetland species are sensitive to large fluctuation range but may be able to adapt, to some extent, to smaller and moderate fluctuation ranges to gain more biomass in certain cases [13, 15, 22]. Still, phenotypic plasticity in response to fluctuation range has been relatively less studied [22, 27].

Higher fluctuation frequency means faster changes between submergence and de-submergence conditions, shortening each period of aerobic conditions [8, 16]. Plant species, which are slow in responding to changing environments, could not resume photosynthesis and thus growth within a short period [6, 28]. By contrast, plant species, which quickly respond to water level changes, often develop fragile shoots by promoting stem elongation and aerenchyma formation [29–30]. These fragile tissues, however, can be easily damaged by streaming water during water fluctuation [6–9]. Thus, resource and biomass investment in shoot may be more risky than the same investment in roots during water fluctuation. Our recent study has shown that recurrent submergence and de-submergence events during water fluctuation both impose negative effects on biomass accumulation of a flood-tolerant species, with severer effects seen at higher frequency [31]. Therefore, the capacity to maintain or even increase biomass accumulation may be important for plants to survive high-frequency water fluctuations. However, it is still not clear whether plant tolerance to high-frequency fluctuation is related to the ability to maintain biomass accumulation. Another question is related to biomass allocation: whether plants allocate more biomass to shoots, roots or reproduction for their survival.

Here we examined the effects of fluctuation range and frequency on growth and biomass allocation of eight wetland species in controlled experiments. These plants were subjected to a control treatment with static water level and fluctuation treatments with three different levels of fluctuation ranges or frequencies. Theoretical and empirical studies have shown that the intermediate level of disturbance is beneficial to plant growth compared with the low and the high levels [14, 16, 22]. We therefore hypothesized (1) that plants perform better at the medium level than at the low and the high levels of fluctuation range and frequency, and (2) that species with higher survival rates allocate relatively more biomass to maintain root growth and reproduction than to shoot elongation.

## Material and methods

### Plant species

Eight wetland plant species, which were neither endangered nor protected, were selected for the experiments: *Acorus calamus* L., *Butomus umbellatus* L., *Iris wilsonii* C. H. Wright, *Lythrum salicaria* L., *Polygonum hydropiper* L., *Pontederia cordata* L., *Sagittaria trifolia* L. and *Typha minima* Funck ex Hoppe (S1 Table). They are widely distributed in wetlands of China and largely affected by water fluctuation [8, 32]. For each species, seedlings of uniform size and similar developmental stages (S1 Table) were bought from Hongyun Aquatic Flower Base in Tianjin, China. The plants were cultivated at the ecological field station of Miyun Reservoir Experimental Base or Cuihu Lake Experimental Base in Beijing, China.

### Experimental design

**Response to different fluctuation ranges (Exp. 1).** Seedlings were transferred to plastic pots (12.5 cm bottom diameter, 17 cm upper diameter and 18 cm deep) filled with local soil from Miyun Reservoir Experimental Base. After recovery for two weeks (8 June 2013), 24 plants from each species were randomly subjected to four treatments, with six replicates each. Thus, there were in total 192 plants for the eight species. The six replicates were separately placed in six tanks (155 cm diameter and 167 cm deep) as six blocks. According to our previous studies [16], four fluctuation ranges were: (i) control (C)—no fluctuation, constantly submerged in static water at 75 cm water depth (the vertical depth from soil surface to water surface), (ii) small range (SR)—water depth changing between 50 and 100 cm, (iii) medium range (MR)—between 25 and 125 cm, (iv) large range (LR)—between 0 and 150 cm (Fig 1A). As with the changes in fluctuation range, two successive fluctuation cycles were conducted during an 80-d experiment. The pots were suspended in the tanks by using ropes that were tied to a steel frame mounted on top of each tank. The water level fluctuation was applied by changing the vertical position of pots in the tank: releasing the rope increased the flooding depth whereas pulling up the rope decreased the flooding depth. The water depth was changed little by little every five days, mimicking gradual changes in water level.

**Response to different fluctuation frequencies (Exp. 2).** On 19 June 2013, the Experiment II was started using a similar setup at Cuihu Lake Experimental Base, including eight species  $\times$  four fluctuation frequencies  $\times$  six replicates. According to our previous studies [8], four fluctuation frequencies were: (i) control (C)—no fluctuation, constantly submerged at 75 cm water depth, (ii) low frequency (LF)—water level fluctuating between 0 and 150 cm twice during the 80-d experiment (40 days per cycle), (iii) medium frequency (MF)—the same fluctuation range but four times (20 days per cycle), and (iv) high frequency (HF)—the same fluctuation range but eight times (10 days per cycle; Fig 1B). The flooding water used in both experiments was the tap water which was added during the experiment to compensate for water loss due to evaporation.

### Growth measurements

On day 80, all plants were taken out of the flooding tanks. Height and ramet number of each plant were measured. Height of a plant was defined as the length of the longest stem of the plant. After 10-d recovery following de-submergence (day 90), if leaves were still turgid and green and new leaves or buds grew out, the plant was considered alive [33]. The surviving plants were harvested on day 90, divided into roots and shoots and dried at 75°C for 72 h to determine dry weight.

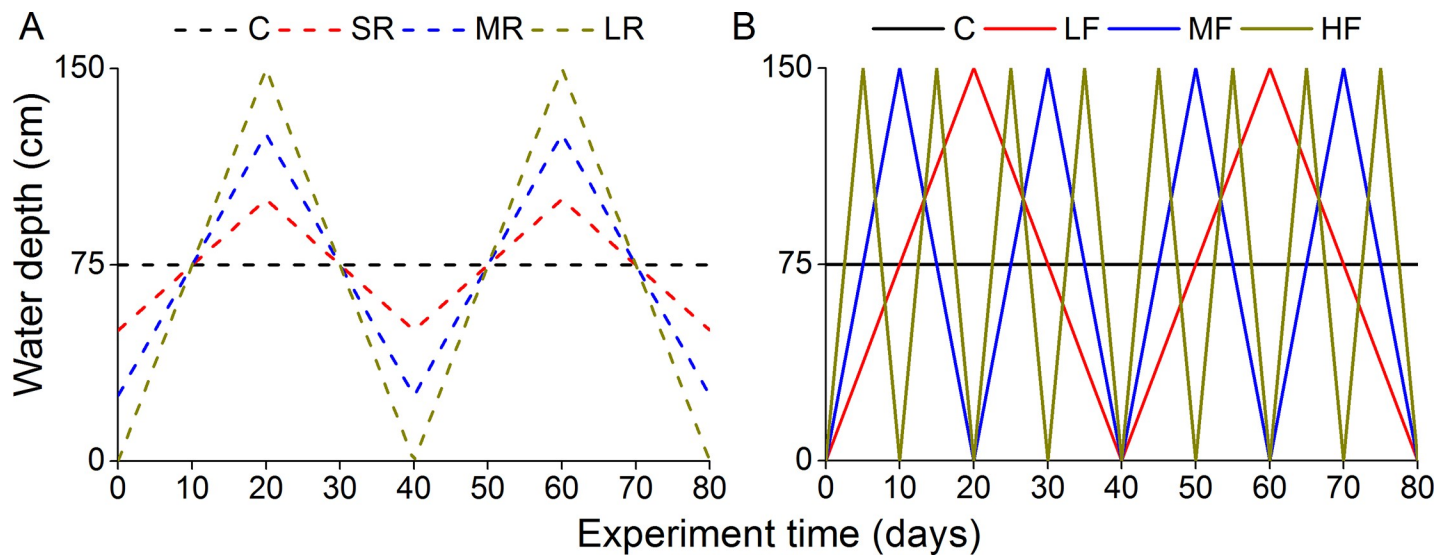

**Fig 1. Settings of different water fluctuation ranges and frequencies.** The treatments were: C–water depth was maintained constantly at 75 cm; SR–water depth changing between 50 and 100 cm twice (two cycles); MR–water depth changing between 25 and 125 cm twice; LR–water depth changing between 0 and 150 cm twice; LF–water depth changing between 0 and 150 cm twice; MF–water depth changing between 0 and 150 cm four times; HF–water depth changing between 0 and 150 cm eight times, during the 80-d experiment.

<https://doi.org/10.1371/journal.pone.0220231.g001>

**Table 1. The survival rate (%) of eight wetland species subjected to water level fluctuation with different ranges (A) and frequencies (B).**

| Species               | (A) Fluctuation range |     |     |     | (B) Fluctuation frequency |     |     |    |
|-----------------------|-----------------------|-----|-----|-----|---------------------------|-----|-----|----|
|                       | C                     | SR  | MR  | LR  | C                         | LF  | MF  | HF |
| <i>A. calamus</i>     | 100                   | 100 | 100 | 100 | 83                        | 83  | 100 | 83 |
| <i>B. umbellatus</i>  | 100                   | 80  | 100 | 100 | 100                       | 50  | 100 | 50 |
| <i>I. wilsonii</i>    | 80                    | 100 | 100 | 100 | 50                        | 67  | 100 | 50 |
| <i>L. salicaria</i>   | 20                    | 40  | 40  | 20  | 100                       | 83  | 50  | 0  |
| <i>P. cordata</i>     | 60                    | 60  | 20  | 0   | 100                       | 100 | 50  | 83 |
| <i>P. hydro Piper</i> | 40                    | 20  | 20  | 40  | 100                       | 17  | 17  | 17 |
| <i>S. trifolia</i>    | 60                    | 60  | 60  | 60  | 67                        | 83  | 83  | 0  |
| <i>T. minima</i>      | 60                    | 20  | 0   | 0   | 17                        | 0   | 0   | 0  |

Treatment codes: C–control (static water level); SR, MR and LR for small, medium and large range of water level fluctuation, respectively; LF, MF and HF for low, medium and high frequency of water level fluctuation, respectively.

<https://doi.org/10.1371/journal.pone.0220231.t001>

**Table 2. Effects of fluctuation range (A) and frequency (B), respectively, on total biomass, shoot biomass and root biomass of the eight riparian species.**

| Species               | (A) Fluctuation range |                     |                     |                     | (B) Fluctuation frequency |                     |                     |                     |
|-----------------------|-----------------------|---------------------|---------------------|---------------------|---------------------------|---------------------|---------------------|---------------------|
|                       | DF                    | Total               | Shoot               | Root                | DF                        | Total               | Shoot               | Root                |
| <i>A. calamus</i>     | 3,16                  | 7.4 <sup>**</sup>   | 6.5 <sup>**</sup>   | 3.4 <sup>*</sup>    | 3,20                      | 4.5 <sup>*</sup>    | 2.2 <sup>ns</sup>   | 9.9 <sup>**</sup>   |
| <i>B. umbellatus</i>  | 3,15                  | 68.0 <sup>***</sup> | 68.4 <sup>***</sup> | 11.3 <sup>***</sup> | 3,17                      | 1.6 <sup>ns</sup>   | 0.9 <sup>ns</sup>   | 4.3 <sup>*</sup>    |
| <i>I. wilsonii</i>    | 3,18                  | 4.8 <sup>*</sup>    | 3.9 <sup>*</sup>    | 3.2 <sup>ns</sup>   | 3,15                      | 40.0 <sup>***</sup> | 18.9 <sup>***</sup> | 38.8 <sup>***</sup> |
| <i>L. salicaria</i>   | -                     | -                   | -                   | -                   | 2,13                      | 1.7 <sup>ns</sup>   | 1.4 <sup>ns</sup>   | 1.9 <sup>ns</sup>   |
| <i>P. cordata</i>     | 1,4                   | 71.5 <sup>**</sup>  | 68.7 <sup>**</sup>  | 73.9 <sup>**</sup>  | 3,18                      | 8.1 <sup>**</sup>   | 5.2 <sup>*</sup>    | 8.7 <sup>**</sup>   |
| <i>P. hydro Piper</i> | -                     | -                   | -                   | -                   | -                         | -                   | -                   | -                   |
| <i>S. trifolia</i>    | 3,11                  | 23.2 <sup>***</sup> | 22.5 <sup>***</sup> | 24.0 <sup>***</sup> | 2,13                      | 15.6 <sup>**</sup>  | 76.1 <sup>***</sup> | 4.7 <sup>*</sup>    |
| <i>T. minima</i>      | -                     | -                   | -                   | -                   | -                         | -                   | -                   | -                   |

F values and significance levels (\*\*\*P < 0.001, \*\*P < 0.01, \*P < 0.05 and <sup>ns</sup>P ≥ 0.05) of one-way ANOVA are given. DF: degrees of freedom; -: data are not available due to low number of surviving plants.

<https://doi.org/10.1371/journal.pone.0220231.t002>

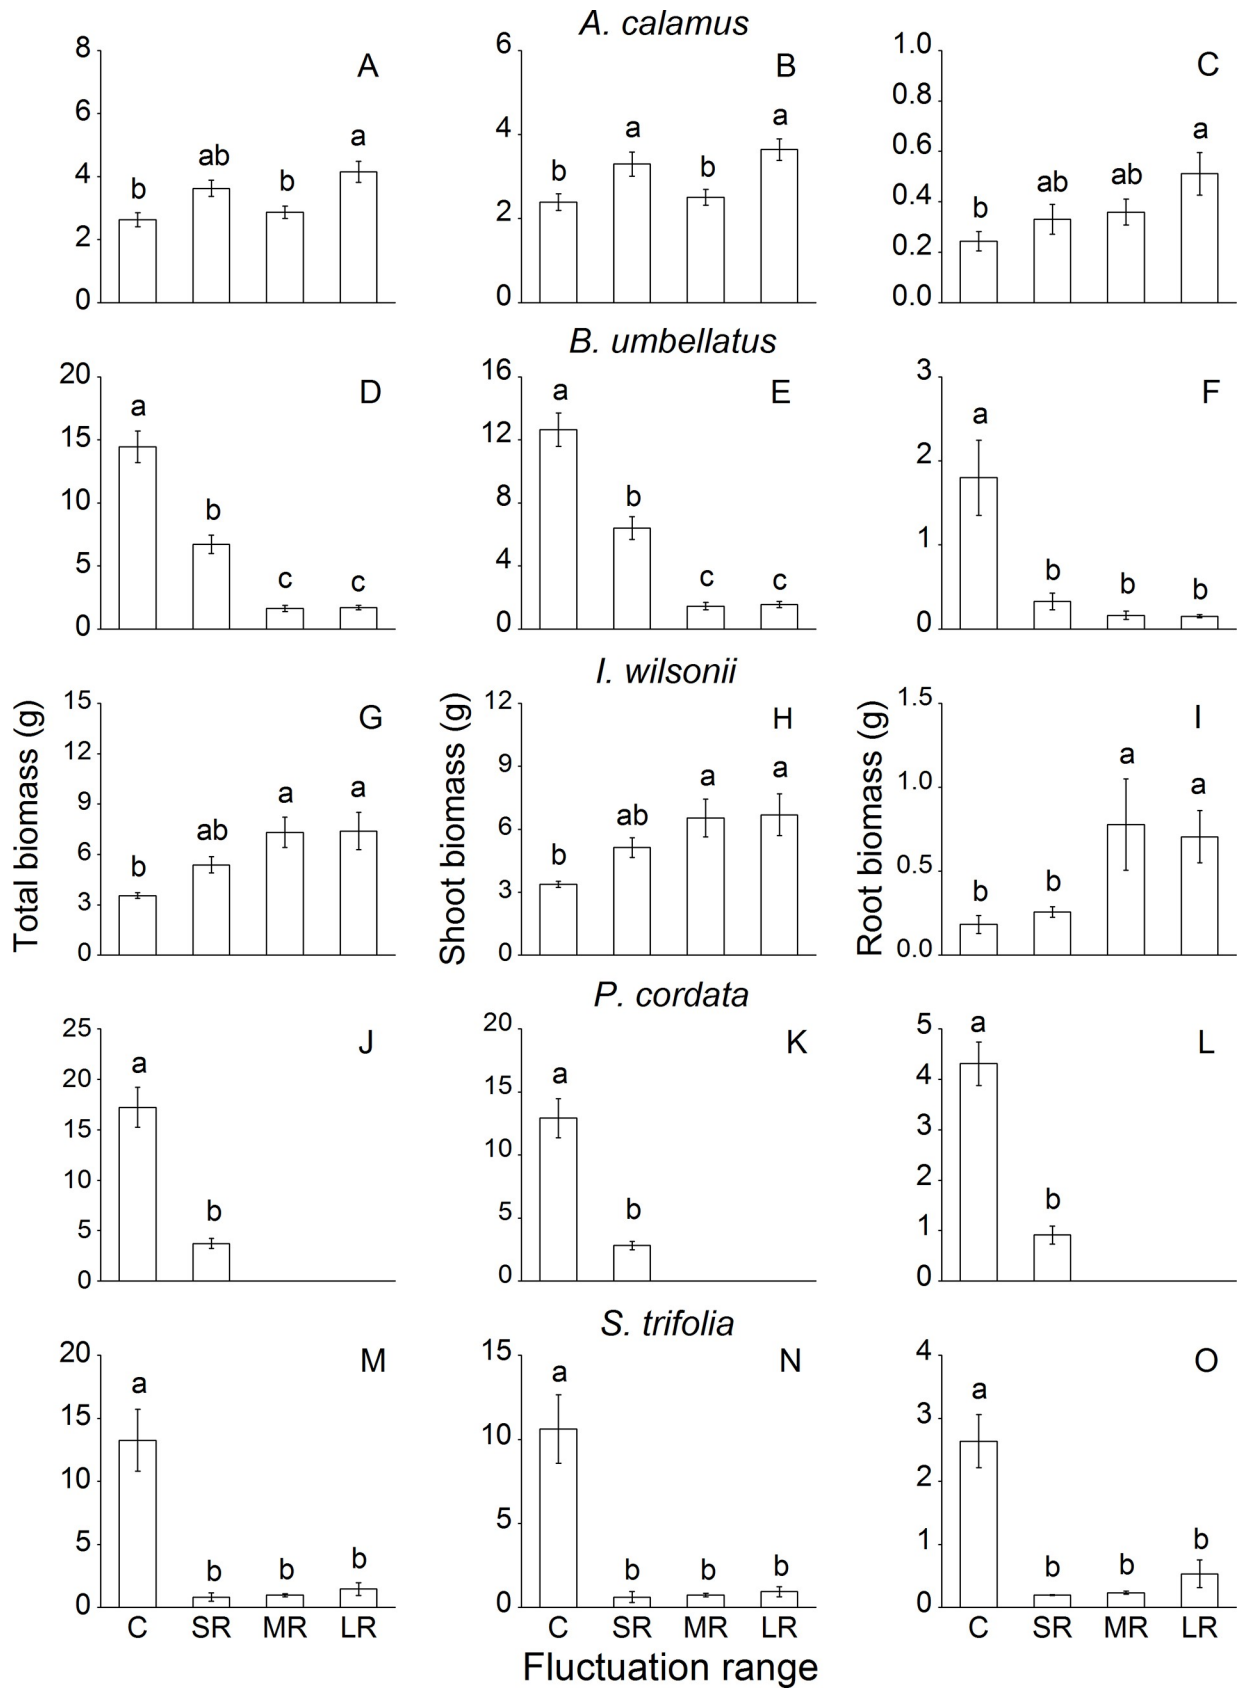

**Fig 2. Total biomass, shoot biomass and root biomass of eight common riparian plants after 80-d treatments with different ranges of water level fluctuation.** For each species, means of treatments with different letters are significantly different at  $P = 0.05$ . Data are mean values  $\pm$  s.e.

<https://doi.org/10.1371/journal.pone.0220231.g002>

## Data analyses

One-way ANOVA followed by Duncan test was used to test differences between treatments for each experiment. During the experiment, one replicate of the treatment of fluctuation range was damaged due to heavy rainfall; the related data were not used in the analyses. Before the analyses, all data were checked for homogeneity of variance. The effects were considered to be significant if  $P < 0.05$ . All analyses were performed by using SPSS 16.0 (SPSS, Chicago, IL, USA).

## Results

### Survival rate

At the end of the range experiment (Exp. 1), *A. calamus*, *B. umbellatus*, *I. wilsonii* and *S. trifolia* had relatively high survival rates ( $\geq 60\%$ ; Table 1A) while the survival rates of other four species were lower in most cases. Two species, *P. cordata* and *T. minima*, did not survive LR and/or MR treatment. At the end of the frequency experiment (Exp. 2), the four species, which had high survival rates in the Exp. 1 (*A. calamus*, *B. umbellatus*, *I. wilsonii* and *S. trifolia*), plus *L. salicaria* and *P. cordata* had relatively high survival rates ( $\geq 50\%$ ), although *L. salicaria* and *S. trifolia* seemed to suffer in HF (Table 1B). Compared to the control, the survival rate of *P. hydropiper* sharply decreased in the flooding treatments at all frequencies. Of all species examined, *A. calamus* was the best and *T. minima* the poorest survivor in both Exp. 1 and Exp. 2 (Table 1).

### Growth responses

Fluctuation range significantly affected shoot biomass, root biomass and total biomass of *A. calamus*, *B. umbellatus*, *I. wilsonii*, *P. cordata* and *S. trifolia*, except for the root biomass of *I. wilsonii* (Table 2A). Biomass of *A. calamus* was significantly higher in LR than in the control (Fig 2A–2C). Likewise, biomass of *I. wilsonii* was higher in MR and LR than in the control (Fig 2G–2I). In contrast, biomass of *B. umbellatus*, *P. cordata* and *S. trifolia* decreased remarkably by water fluctuation at all ranges (Fig 2). Not enough plants of *L. salicaria*, *P. hydropiper* and *T. minima* survived for the biomass measurements on day 80.

Fluctuation frequency significantly affected root biomass and total biomass of *A. calamus*, root biomass of *B. umbellatus*, and shoot biomass, root biomass and total biomass of *I. wilsonii*, *P. cordata* and *S. trifolia* (Table 2B). Total biomass and root biomass of *A. calamus* were significantly higher in the treatments with water fluctuation at all frequencies than in the control, and its shoot biomass was also higher in LF than in the control (Fig 3A–3C). Total biomass and shoot biomass of *I. wilsonii* were higher in MF and HF than in the control, and its root biomass was also higher in HF than in the control (Fig 3G–3I). Total biomass and shoot biomass of *B. umbellatus* and *L. salicaria* were not significantly affected by fluctuation frequency, except for *L. salicaria* in HF (Fig 3D, 3E, 3J and 3K). However, fluctuation at different frequencies markedly decreased biomass of *P. cordata* and *S. trifolia* (Fig 3M–3R). As in Exp. 1, biomass data of *P. hydropiper* and *T. minima* were not available for Exp. 2 due to the low survival rates of these plants.

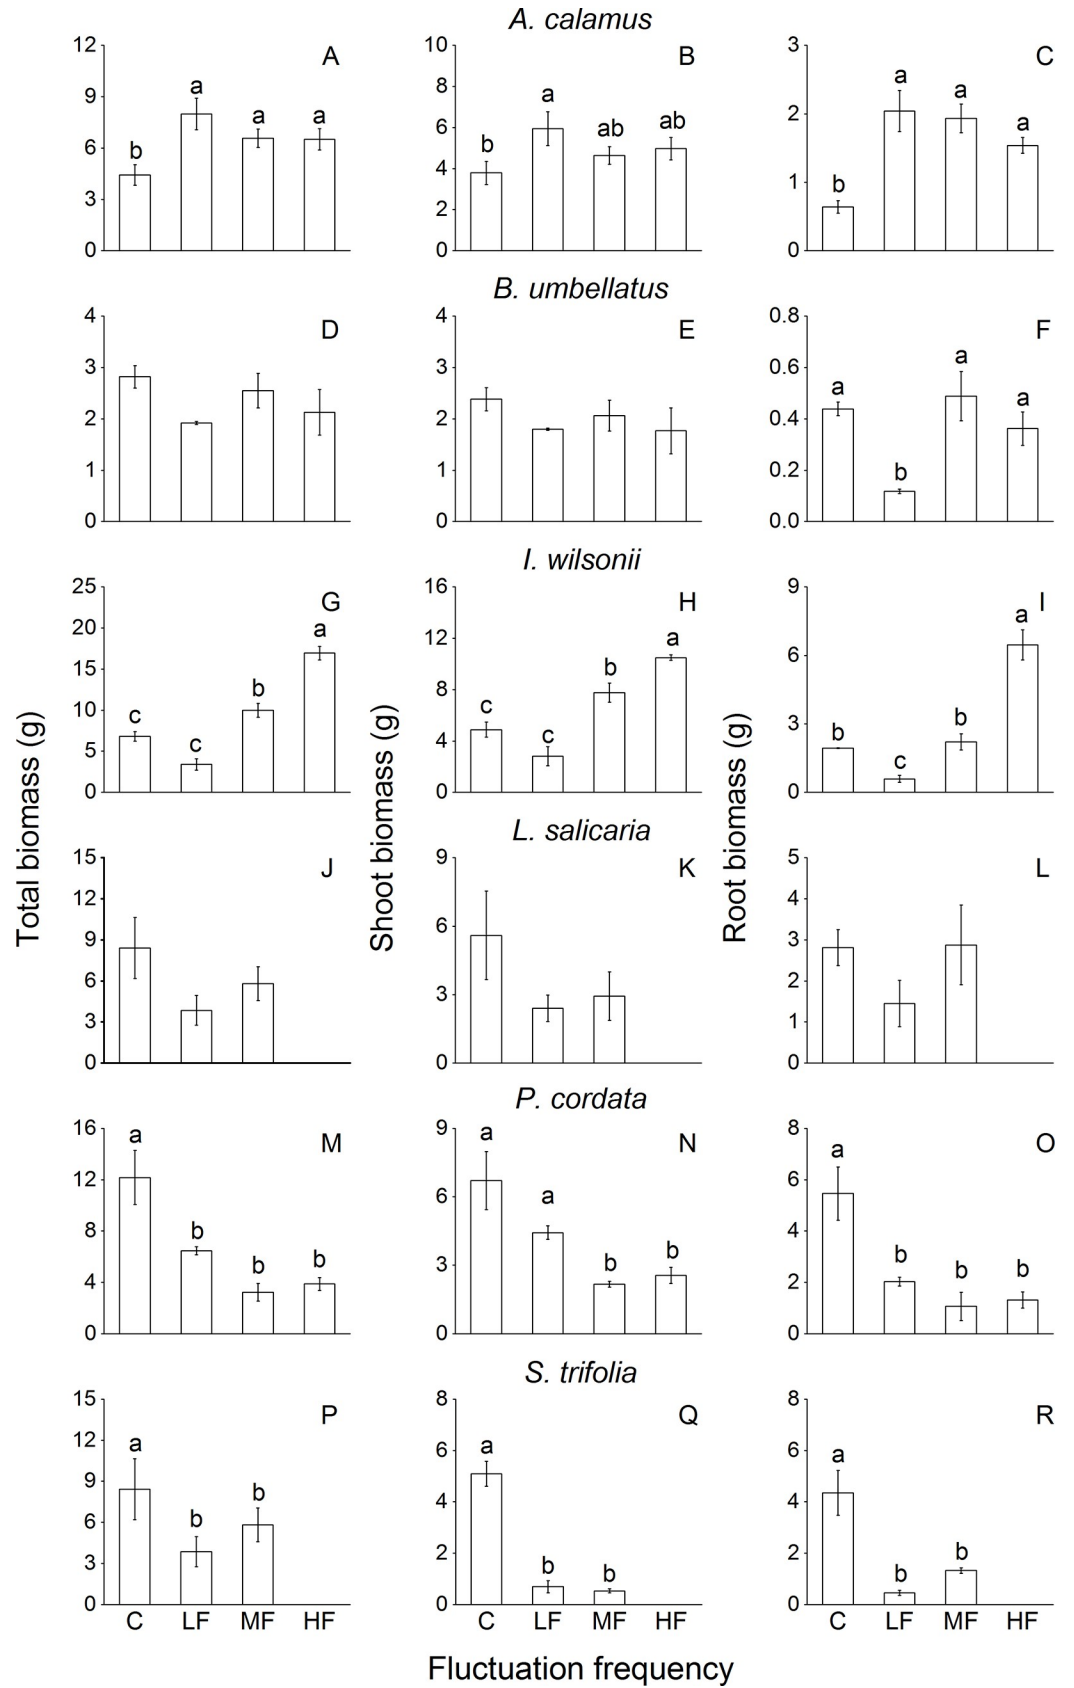

**Fig 3. Total biomass, shoot biomass and root biomass of eight common riparian plants after 80-d treatments with different frequencies of water level fluctuation.** For each species, means of treatments with different letters are significantly different at  $P = 0.05$ . Data are mean values  $\pm$  s.e.

<https://doi.org/10.1371/journal.pone.0220231.g003>

### Biomass allocation

Fluctuation range significantly affected ramet number of *A. calamus* and *B. umbellatus*, and plant height and ramet number of *S. trifolia* (Table 3A). Ramet number of *A. calamus* was significantly higher in MR and LR than in the control (Fig 4B). However, ramet numbers of *B. umbellatus* and *S. trifolia* were lower in fluctuation at all ranges than in the control (Fig 4E and 4N). Fluctuation at all ranges significantly decreased plant height of *S. trifolia* compared to the control (Fig 4M).

Fluctuation frequency significantly affected plant height of *B. umbellatus*, *L. salicaria*, *P. cordata* and *S. trifolia*, and root-to-shoot ratio (R/S) of *A. calamus*, *I. wilsonii* and *S. trifolia* (Table 3B). Compared to the control, fluctuation at all frequencies significantly decreased plant height of *B. umbellatus*, *P. cordata* and *S. trifolia* (Fig 5D, 5M and 5P). The HF treatment increased ramet number of *A. calamus* and *I. wilsonii* (Fig 5B and 5H). Fluctuation at all frequencies significantly increased R/S of *A. calamus* while HF and MF increased R/S of *I. wilsonii* and *S. trifolia*, respectively (Fig 5C, 5I and 5R).

### Discussion

*A. calamus*, *B. umbellatus*, *I. wilsonii* and *S. trifolia* showed high survival rates when subjected to water fluctuation with different ranges (Table 1A). As for fluctuation with different frequencies, *A. calamus*, *B. umbellatus*, *I. wilsonii* and *P. cordata* had high survival rates (Table 1B). The survival rates of the first four species were comparable after the 80-d treatments with different fluctuation ranges, while the survival rates of *A. calamus*, *B. umbellatus* and *I. wilsonii* were higher at MF than at LF and HF. This confirms the first hypothesis that intermediate levels of fluctuation frequency have beneficial effects on plant survival compared to constant submergence and low- or high-frequency fluctuation [14, 16, 22]. Our results are also consistent with the former findings that moderate levels of water fluctuation promote seed germination and seedling establishment of riparian plants, as well as growth of submerged macrophytes in wetlands [11, 13–14, 22, 28].

**Table 3. Effects of fluctuation range (A) and frequency (B), respectively, on plant height (PH), ramet number (RN) and root to shoot ratio (R/S) of the eight riparian species.**

| Species               | (A) Fluctuation range |                    |                    |                   | (B) Fluctuation frequency |                     |                   |                   |
|-----------------------|-----------------------|--------------------|--------------------|-------------------|---------------------------|---------------------|-------------------|-------------------|
|                       | DF                    | PH                 | RN                 | R/S               | DF                        | PH                  | RN                | R/S               |
| <i>A. calamus</i>     | 3,19                  | 1.4 <sup>ns</sup>  | 4.9 <sup>*</sup>   | 1.1 <sup>ns</sup> | 3,20                      | 0.9 <sup>ns</sup>   | 2.5 <sup>ns</sup> | 5.1 <sup>*</sup>  |
| <i>B. umbellatus</i>  | 3,18                  | 2.0 <sup>ns</sup>  | 10.3 <sup>**</sup> | 1.3 <sup>ns</sup> | 3,17                      | 14.0 <sup>***</sup> | 1.3 <sup>ns</sup> | 2.6 <sup>ns</sup> |
| <i>I. wilsonii</i>    | 3,18                  | 2.1 <sup>ns</sup>  | 0.1 <sup>ns</sup>  | 1.4 <sup>ns</sup> | 3,15                      | 2.1 <sup>ns</sup>   | 1.9 <sup>ns</sup> | 3.5 <sup>*</sup>  |
| <i>L. salicaria</i>   | -                     | -                  | -                  | -                 | 2,13                      | 4.5 <sup>*</sup>    | 0.1 <sup>ns</sup> | 1.7 <sup>ns</sup> |
| <i>P. cordata</i>     | 4                     | -0.2 <sup>ns</sup> | -0.9 <sup>ns</sup> | 1.0 <sup>ns</sup> | 3,18                      | 10.2 <sup>**</sup>  | 2.1 <sup>ns</sup> | 2.2 <sup>ns</sup> |
| <i>P. hydropteris</i> | -                     | -                  | -                  | -                 | -                         | -                   | -                 | -                 |
| <i>S. trifolia</i>    | 3,11                  | 6.1 <sup>*</sup>   | 5.1 <sup>**</sup>  | 1.1 <sup>ns</sup> | 2,13                      | 22.2 <sup>***</sup> | 1.1 <sup>ns</sup> | 4.8 <sup>*</sup>  |
| <i>T. minima</i>      | -                     | -                  | -                  | -                 | -                         | -                   | -                 | -                 |

F values and significance levels (\*\*\* $P < 0.001$ , \*\* $P < 0.01$ , \* $P < 0.05$  and <sup>ns</sup> $P \geq 0.05$ ) of one-way ANOVA are given. DF: degrees of freedom; -: data are not available due to low number of surviving plants.

<https://doi.org/10.1371/journal.pone.0220231.t003>



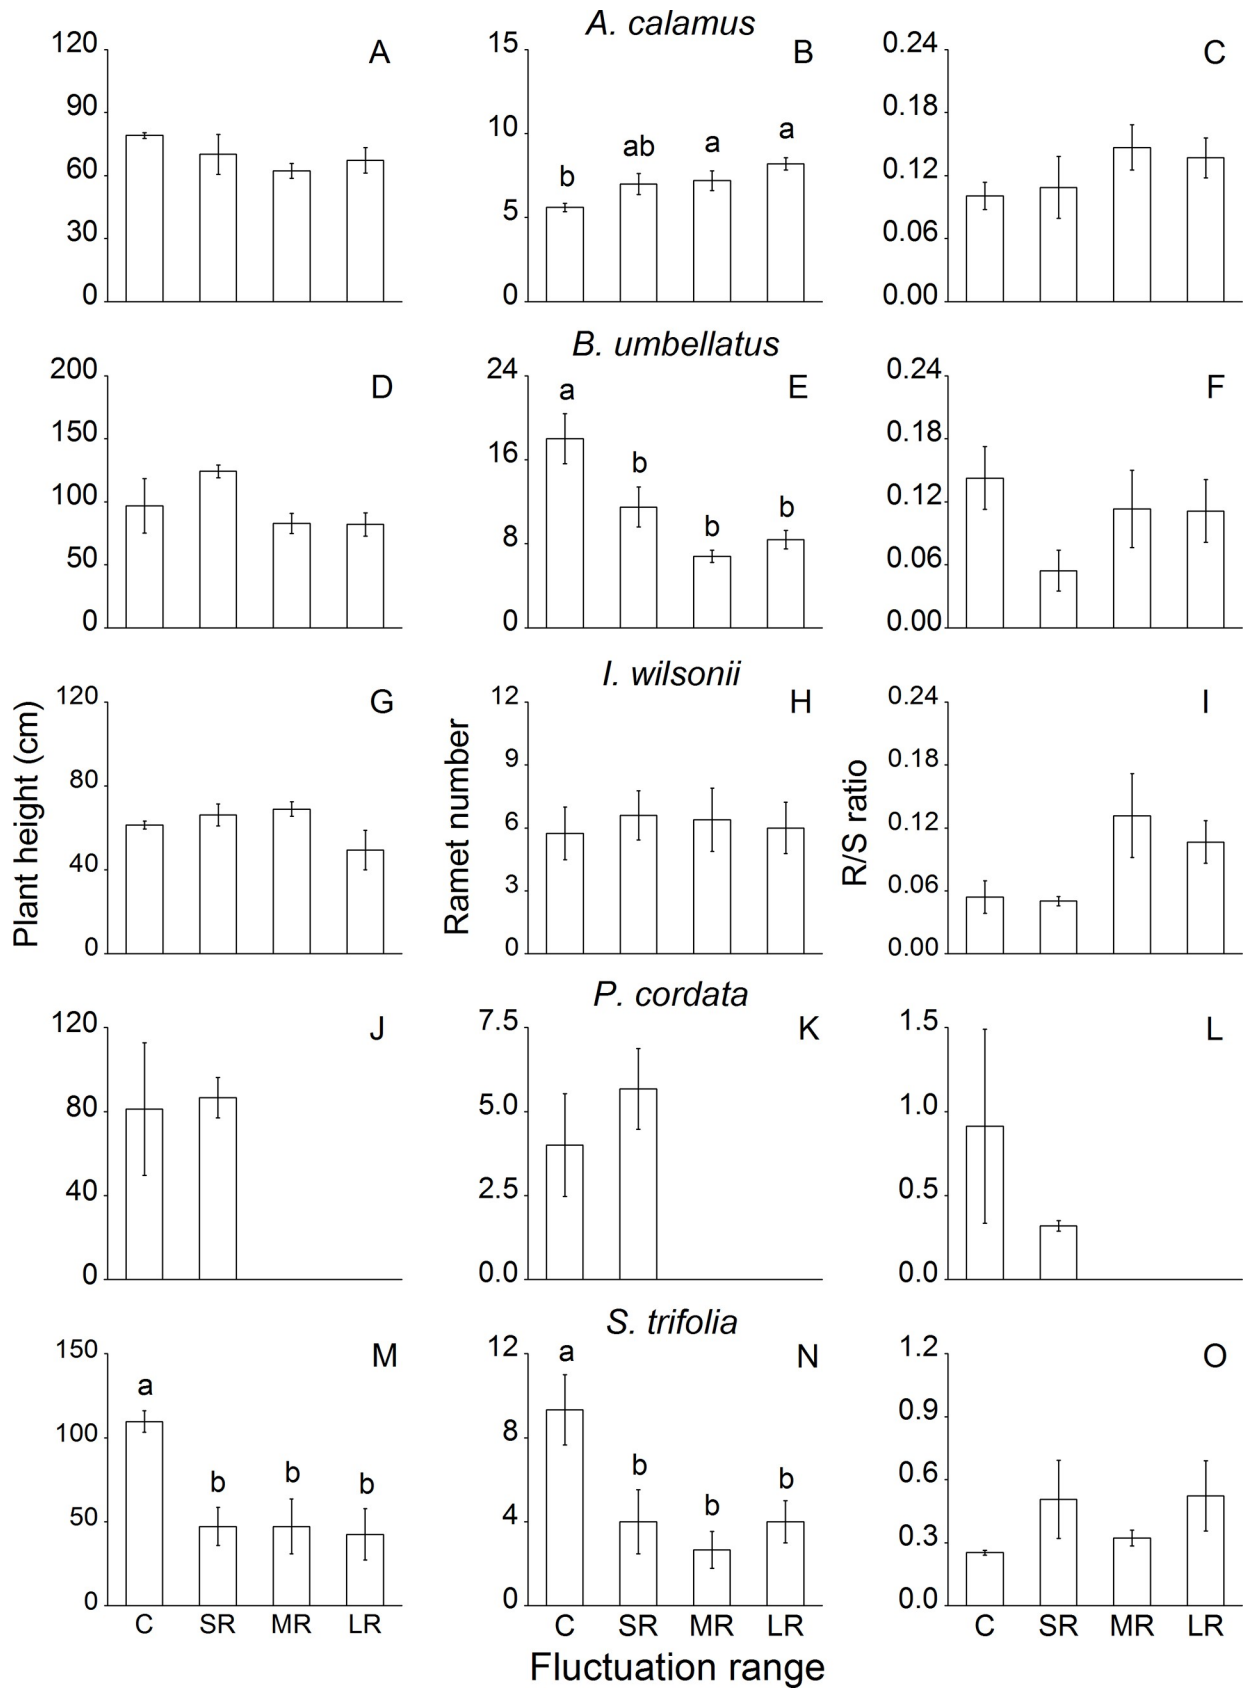

**Fig 4. Plant height, ramet number and root-to-shoot (R/S) ratio of eight common riparian plants after 80-d treatments with different ranges of water level fluctuation.** For each species, means of treatments with different letters are significantly different at  $P = 0.05$ . Data are mean values  $\pm$  s.e.

<https://doi.org/10.1371/journal.pone.0220231.g004>

Acclimation to water level fluctuation is, however, not a common feature of wetland plants. In the present study, *L. salicaria*, *P. cordata*, *P. hydropiper* and *T. minima* showed low survival rates in the treatments with various fluctuation ranges (Table 1A). Compared to the other species, *L. salicaria* and *P. hydropiper* may have relatively smaller carbohydrate storage [34–35], which could be a reason for their poor survival rates. Besides, a low capacity to cope with low  $O_2$ , low light intensity and high hydrostatic pressure could be another reason [21–22]. In response to fluctuation frequency, *L. salicaria*, *P. hydropiper*, *S. trifolia* and *T. minima* had low survival rates (Table 1B). The high frequency leads to faster changes in aerobic and hypoxia conditions [8, 16], which may be not long enough for these species to resume photosynthesis and growth in the aerobic condition, therefore resulting in a high mortality.

In response to fluctuation range, only *A. calamus* and *I. wilsonii* could maintain comparable or even higher growth and biomass accumulation than the control plants, while growth of the other six species decreased, especially in MR and LR (Fig 2). Compared with SR, the LR treatment involved deeper submergence, resulting in lower light intensity, slower gas diffusion and higher water pressure [29, 36]. The greatly decreased light intensity and gas diffusion would severely restrict photosynthesis and plant growth [37–38]. Water pressure could also be another important factor that has limited plant growth in LR and MR [35], although the effect of water pressure is still unclear. Additionally, significantly decreased ramet number found in the fluctuation range experiment could also have led to reduced growth of *B. umbellatus* and *S. trifolia* (Fig 4).

When challenged by different water fluctuation frequencies, *A. calamus*, *B. umbellatus* and *I. wilsonii* could maintain or even increase biomass accumulation compared with the control plants (Fig 3). Correspondingly, these species could maintain or significantly increase the ramet number during the treatments with different fluctuation frequencies (Fig 5). Maintaining or increasing the capacity for asexual propagation is important for survival of wetland plants subjected to mechanical stress caused by streaming water and wind [39–40]. Asexual propagation and biomass allocation to ramets could partly counterbalance the detrimental effect of mechanical stress on sexual propagation [41]. Moreover, frequent water level fluctuations significantly increased root biomass accumulation in *A. calamus* at all frequencies, *I. wilsonii* at HF and *S. trifolia* at MF (Figs 3 and 5). By promoting biomass accumulation in roots, plants could more safely store carbohydrate, and at the same time build more stable anchorage in conditions with frequent disturbances [39, 42]. Larger resource storage and better anchorage will be beneficial for the maintenance, recovery and growth of shoots and new ramets.

These species seem to have the ability to acclimate to conditions with recurrent submergence, even at high frequencies. Such acclimation, called 'stress memory' in other studies, could increase plant tolerance to subsequent exposure to the same kind of stress [43–45]. Compared with a single stress event, some studies have shown that plants were able to induce faster and stronger responses to the same stress when applied repeatedly [43, 46]. The wetland species *Alternanthera philoxeroides* showed dynamic photosynthetic acclimation in response to cyclic events of submergence and de-submergence, with down-regulation during submergence and prompt up-regulation after de-submerged [31]. Moreover, an increasing number of evidence have been provided to demonstrate growth, photosynthetic and/or metabolic acclimation to recurrent abiotic stress, such as drought [47], cold [48], high temperature [46] and salinity [49].

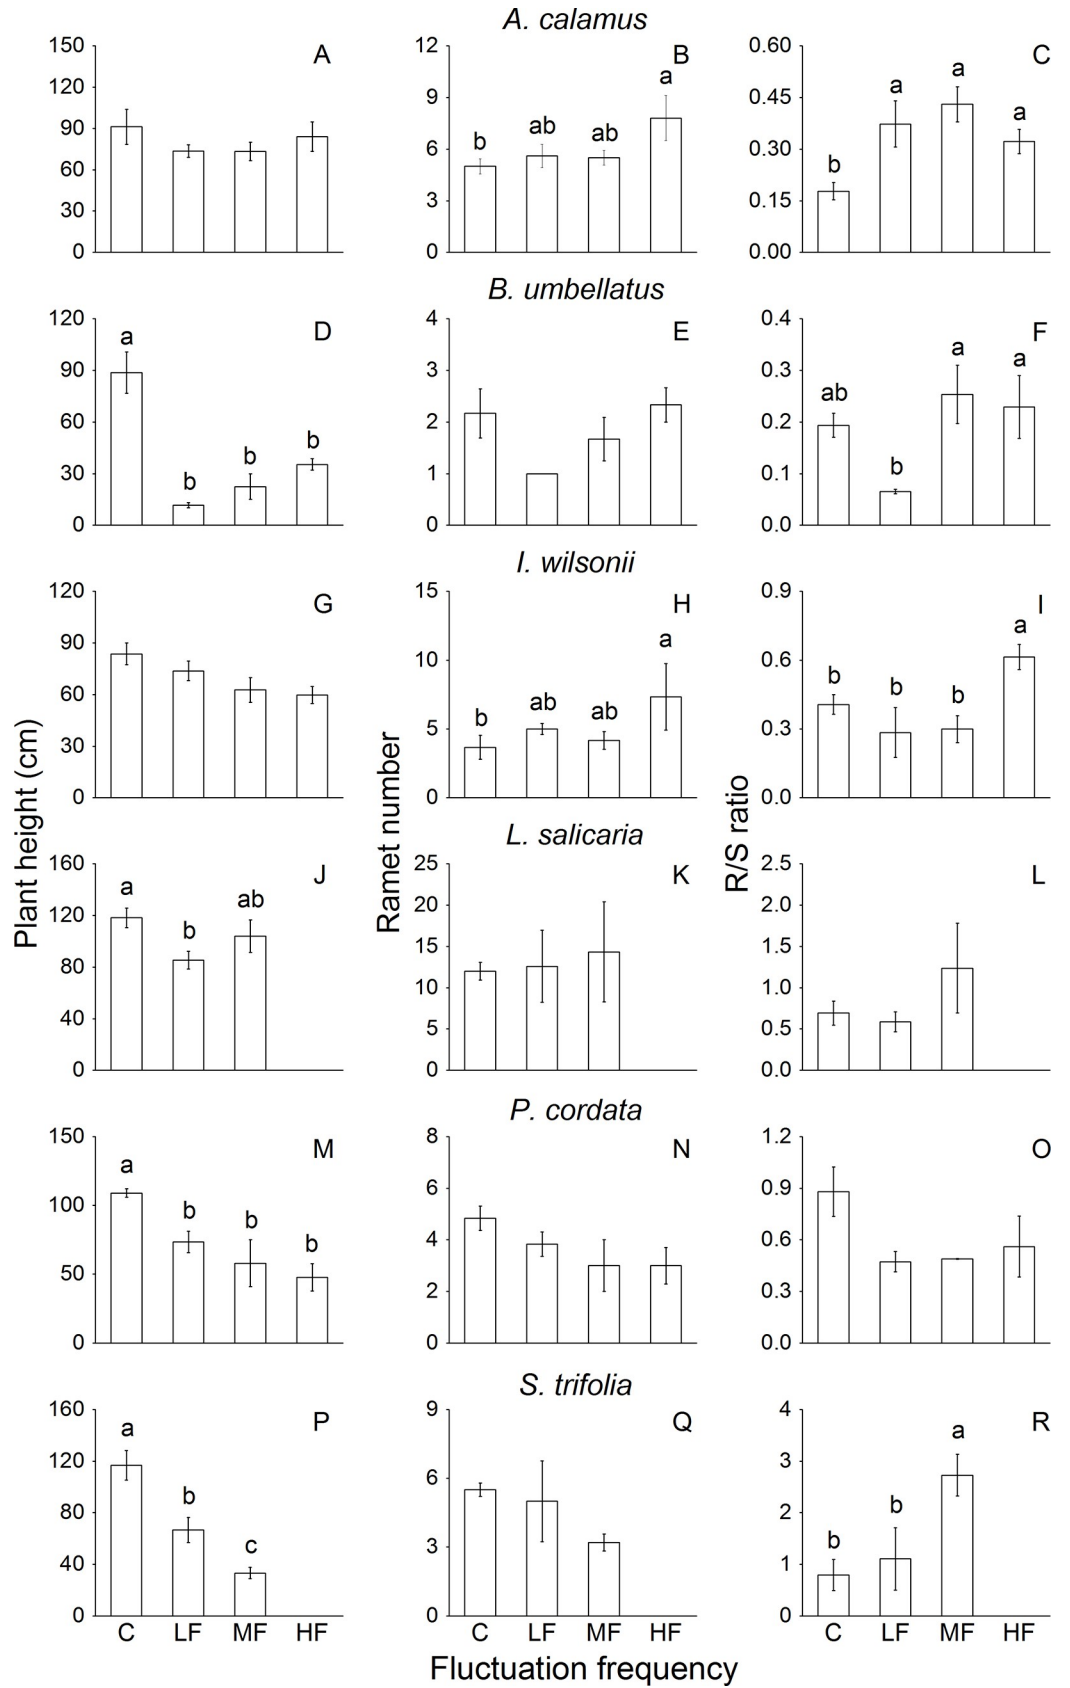

**Fig 5. Plant height, ramet number and root-to-shoot (R/S) ratio of eight common riparian plants after 80-d treatments with different frequencies of water level fluctuation.** For each species, means of treatments with different letters are significantly different at  $P = 0.05$ . Data are mean values  $\pm$  s.e.

<https://doi.org/10.1371/journal.pone.0220231.g005>

Validating our second hypothesis, species with high survival rates and growth capacity neither elongated shoot nor invested relatively more biomass in shoot growth during water level fluctuation with all ranges and frequencies tested (Figs 4 and 5). Shoot growth plasticity such as stem/petiole elongation is commonly observed in wetland plants in response to continuous submergence, which is triggered by fast increase of endogenous ethylene concentration [34, 50–52]. However, we found that shoot elongation was greatly impeded in response to water level fluctuation at different ranges and frequencies (Figs 4 and 5). Recurrent de-submergence episodes during water fluctuation re-expose submerged plants to aerobic conditions. When de-submerged, the entrapped ethylene in plant tissues could be quickly lost due to its high diffusion coefficient in aerobic conditions [53]. The ethylene concentration might be difficult to reach the threshold to trigger stem and petiole elongation. Furthermore, strong sunlight and UV may also inhibit elongation growth of these organs upon exposure to aerobic conditions [54–55]. Another merit of not elongating (fragile) shoot may be the low risk of mechanical damage in floodwater when the shoot remains compact [39–40].

We conclude that the plant species with high survival rates ( $\geq 50\%$ ), such as *A. calamus*, *B. umbellatus* and *I. wilsonii*, perform better at the medium level than at the low and high levels of water fluctuation frequency. Accordingly, they can benefit from the intermediate frequency of water fluctuation. While the species differed in biomass allocation in roots and ramets, they similarly showed reduction of shoot elongation during water fluctuation at varying ranges and frequencies. Therefore, the capacity for asexual propagation and biomass accumulation rather than shoot elongation is important for survival of these plants during water fluctuation. These findings could provide some hints to develop optimal strategies for management and restoration of degraded or destroyed wetland ecosystems with frequent water fluctuation and disturbance.

## Supporting information

**S1 Table. General information of eight common riparian species.**

(PDF)

## Acknowledgments

We thank Xing-Xing Jiang and He-Yuan Huang for their assistance during plant cultivation and harvesting. We are also grateful to the academic editor and three anonymous referees for providing valuable comments and Dr. Shizue Matsubara for linguistic corrections on the manuscript.

## Author Contributions

**Conceptualization:** Guan-Wen Wei, Yue Chen, Fang-Li Luo, Fei-Hai Yu.

**Data curation:** Guan-Wen Wei, Yue Chen.

**Formal analysis:** Xin-Sheng Sun, Yu-Han Chen, Fang-Li Luo, Fei-Hai Yu.

**Funding acquisition:** Fang-Li Luo, Fei-Hai Yu.

**Writing – original draft:** Guan-Wen Wei.

Writing – review & editing: Fang-Li Luo, Fei-Hai Yu.

## References

1. Raulings EJ, Morris K, Roache MC, Boon PI. The importance of water regimes operating at small spatial scales for the diversity and structure of wetland vegetation. *Freshwater Biol.* 2010; 55: 701–715. <https://doi.org/10.1111/j.1365-2427.2009.02311.x>
2. Jian Z, Ma F, Guo Q, Qin A, Xiao W. Long-term responses of riparian plants' composition to water level fluctuation in China's Three Gorges Reservoir. *PLoS ONE.* 2018; 13: e0207689. <https://doi.org/10.1371/journal.pone.0207689> PMID: 30485328
3. Colmer TD, Pedersen O, Wetson AM, Flowers TJ. Oxygen dynamics in a salt-marsh soil and in *Suaeda maritima* during tidal submergence. *Environ Exp Bot.* 2013; 92: 73–82. <https://doi.org/10.1016/j.envexpbot.2012.07.002>
4. Sasidharan R, Hartman S, Liu Z, Martopawiro S, Sajeev N, van Veen H, et al. Signal dynamics and interactions during flooding stress. *Plant Physiol.* 2018; 176: 1106–1117. <https://doi.org/10.1104/pp.17.01232> PMID: 29097391
5. Voeselek LACJ, Sasidharan R, Visser EJW, Bailey-Serres J. Flooding stress signaling through perturbations in oxygen, ethylene, nitric oxide and light. *New Phytol.* 2016; 209: 39–43. <https://doi.org/10.1111/nph.13775> PMID: 26625347
6. Baastrup-Spohr L, Møller CL, Sand-Jensen K. Water-level fluctuations affect sediment properties, carbon flux and growth of the isoetid *Littorella uniflora* in oligotrophic lakes. *Freshwater Biol.* 2016; 61: 301–315. <https://doi.org/10.1111/fwb.12704>.
7. Leyer I. Predicting plant species' responses to river regulation: the role of water level fluctuations. *J Appl Ecol.* 2005; 42: 239–250. <https://doi.org/10.1111/j.1365-2664.2005.01009.x>.
8. Luo F-L, Jiang X-X, Li H-L, Yu F-H. Does hydrological fluctuation alter impacts of species richness on biomass in wetland plant communities? *J Plant Ecol.* 2016; 9: 434–441. <https://doi.org/10.1093/jpe/rtv065>.
9. Wright AJ, de Kroon H, Visser EJW, Buchmann T, Ebeling A, Eisenhauer N, et al. Plants are less negatively affected by flooding when growing in species-rich plant communities. *New Phytol.* 2017; 213: 645–656. <https://doi.org/10.1111/nph.14185> PMID: 27717024
10. Zhang AY, Cornwell W, Li ZJ, Xiong GM, Yang D, Xie ZQ. Dam effect on soil nutrients and potentially toxic metals in a reservoir riparian zone. *Clean-Soil Air Water.* 2019; 47: 1700497. <https://doi.org/10.1002/clen.201700497>.
11. Lu J, Bunn SE, Burford MA. Nutrient release and uptake by littoral macrophytes during water level fluctuations. *Sci Total Environ.* 2018; 622: 29–40. <https://doi.org/10.1016/j.scitotenv.2017.11.199> PMID: 29202366
12. Warwick NWM, Brock MA. Plant reproduction in temporary wetlands: the effects of seasonal timing, depth, and duration of flooding. *Aquat Bot.* 2003; 77: 153–167. [https://doi.org/10.1016/S0304-3770\(03\)00102-5](https://doi.org/10.1016/S0304-3770(03)00102-5).
13. Deegan BM, White SD, Ganf GG. Nutrients and water level fluctuations: A study of three aquatic plants. *River Res Appl.* 2012; 28: 359–368. <https://doi.org/10.1002/rra.1461>.
14. Casanova MT, Brock MA. How do depth, duration and frequency of flooding influence the establishment of wetland plant communities? *Plant Ecol.* 2000; 147: 237–250. <https://doi.org/10.1023/a:1009875226637>
15. Deegan BM, White SD, Ganf GG. The influence of water level fluctuations on the growth of four emergent macrophyte species. *Aquat Bot.* 2007; 86: 309–315. <https://doi.org/10.1016/j.aquabot.2006.11.006>.
16. Wang P, Zhang Q, Xu Y-S, Yu F-H. Effects of water level fluctuation on the growth of submerged macrophyte communities. *Flora.* 2016; 223: 83–89. <https://doi.org/10.1016/j.flora.2016.05.005>.
17. IPCC. Intergovernmental panel on climate change 2014: Impacts, adaptation, and vulnerability. Cambridge: Cambridge University Press. 2014.
18. Garssen AG, Baastrup-Pedersen A, Voeselek LACJ, Verhoeven JTA, Soons MB. Riparian plant community responses to increased flooding: a meta-analysis. *Glob Change Biol.* 2015; 21: 2881–2890. <https://doi.org/10.1111/gcb.12921>.
19. Striker GG, Casas C, Kuang X, Grimoldi AA. No escape? Costs and benefits of leaf de-submergence in the pasture grass *Chloris gayana* under different flooding regimes. *Funct Plant Biol.* 2017; 44: 899–906. <https://doi.org/10.1071/fp17128>.
20. Striker GG, Colmer TD. Flooding tolerance of forage legumes. *J Exp Bot.* 2017; 68: 1851–1872. <https://doi.org/10.1093/jxb/erw239> PMID: 27325893

21. Lopez P, Lopez-Tarazon JA, Casas-Ruiz JP, Pompeo M, Ordóñez J, Muñoz I. Sediment size distribution and composition in a reservoir affected by severe water level fluctuations. *Sci Total Environ*. 2016; 540: 158–167. <https://doi.org/10.1016/j.scitotenv.2015.06.033> PMID: 26105704
22. Sarneel JM, Janssen RH, Rip WJ, Bender IMA, Bakker ES. Windows of opportunity for germination of riparian species after restoring water level fluctuations: a field experiment with controlled seed banks. *J Appl Ecol*. 2014; 51: 1006–1014. <https://doi.org/10.1111/1365-2664>.
23. Arias ME, Wittmann F, Parolin P, Murray-Hudson M, Cochrane TA. Interactions between flooding and upland disturbance drives species diversity in large river floodplains. *Hydrobiologia*. 2018; 814: 5–17. <https://doi.org/10.1007/s10750-016-2664-3>.
24. Gattringer JP, Ludewig K, Harvolk-Schoening S, Donath TW, Otte A. Interaction between depth and duration matters: flooding tolerance of 12 floodplain meadow species. *Plant Ecol*. 2018; 219: 973–984. <https://doi.org/10.1007/s11258-018-0850-2>.
25. Liu B, Jiang M, Tong S, Zhang W, Wu H, Liu Y, et al. Differential flooding impacts on *Echinochloa caudata* and *Scirpus planiculmis*: implications for weed control in wetlands. *Wetlands*. 2016; 36: 979–984. <https://doi.org/10.1007/s13157-016-0805-0>.
26. Chen D, Ali A, Yong X-H, Lin C-G, Niu X-H, Cai A-M, et al. A multi-species comparison of selective placement patterns of ramets in invasive alien and native clonal plants to light, soil nutrient and water heterogeneity. *Sci Total Environ*. 2019; 657: 1568–1577. <https://doi.org/10.1016/j.scitotenv.2018.12.099> PMID: 30677922
27. van der Valk A, Mushet DM. Interannual water-level fluctuations and the vegetation of prairie potholes: potential impacts of climate change. *Wetlands*. 2016; 36: S397–S406. <https://doi.org/10.1007/s13157-016-0850-8>.
28. Zhang X, Liu X, Ding Q. Morphological responses to water-level fluctuations of two submerged macrophytes, *Myriophyllum spicatum* and *Hydrilla verticillata*. *J Plant Ecol*. 2013; 6: 64–70. <https://doi.org/10.1093/jpe/rts009>.
29. Voesenek L, Colmer TD, Pierik R, Millenaar FF, Peeters AJM. How plants cope with complete submergence. *New Phytol*. 2006; 170: 213–226. <https://doi.org/10.1111/j.1469-8137.2006.01692.x> PMID: 16608449
30. Huber H, Chen X, Hendriks M, Keijsers D, Voesenek LACJ, Pierik R, et al. Plasticity as a plastic response: how submergence-induced leaf elongation in *Rumex palustris* depends on light and nutrient availability in its early life stage. *New Phytol*. 2012; 194: 572–582. <https://doi.org/10.1111/j.1469-8137.2012.04075.x> PMID: 22335539
31. Luo F-L, Matsubara S, Chen Y, Wei G-W, Dong B-C, Zhang M-X, et al. Consecutive submergence and de-submergence both impede growth of a riparian plant during water level fluctuations with different frequencies. *Environ Exp Bot*. 2018; 155: 641–649. <https://doi.org/10.1016/j.envexpbot.2018.08.015>.
32. Wu Z-Y, Chen X-Q. *Flora republicae popularis sinicae*. Beijing: Science Press; 2004.
33. van Eck W, van de Steeg HM, Blom C, de Kroon H. Is tolerance to summer flooding correlated with distribution patterns in river floodplains? A comparative study of 20 terrestrial grassland species. *Oikos*. 2004; 107: 393–405. <https://doi.org/10.1111/j.0030-1299.2004.13083.x>.
34. Chun YJ, Kim CG, Moloney KA. Comparison of life history traits between invasive and native populations of purple loosestrife (*Lythrum salicaria*) using nonlinear mixed effects model. *Aquatic Botany*. 2010; 93: 221–226. <https://doi.org/10.1016/j.aquabot.2010.09.001>.
35. Chen X-S, Li Y-F, Cai Y-H, Xie Y-H, Deng Z-M, Li F, et al. Differential strategies to tolerate flooding in *Polygonum hydropiper* plants originating from low- and high-elevation habitats. *Front Plant Sci*. 2019; 9: 1970. <https://doi.org/10.3389/fpls.2018.01970> PMID: 30687365
36. Winkel A, Visser EJW, Colmer TD, Brodersen KP, Voesenek LACJ, Sand-Jensen K, et al. Leaf gas films, underwater photosynthesis and plant species distributions in a flood gradient. *Plant Cell Environ*. 2016; 39: 1537–1548. <https://doi.org/10.1111/pce.12717> PMID: 26846194
37. Wu Y-S, Yang C-Y. Physiological responses and expression profile of NADPH oxidase in rice (*Oryza Sativa*) seedlings under different levels of submergence. *Rice*. 2016; 9: 2. <https://doi.org/10.1186/s12284-016-0074-9> PMID: 26810875
38. Pedersen O, Malik AI, Colmer TD. Submergence tolerance in *Hordeum marinum*: dissolved CO<sub>2</sub> determines underwater photosynthesis and growth. *Funct Plant Biol*. 2010; 37: 524–531. <https://doi.org/10.1071/fp09298>.
39. Puijalon S, Lena J-P, Riviere N, Champagne J-Y, Rostan J-C, Bornette G. Phenotypic plasticity in response to mechanical stress: hydrodynamic performance and fitness of four aquatic plant species. *New Phytol*. 2008; 177: 907–917. <https://doi.org/10.1111/j.1469-8137.2007.02314.x> PMID: 18275493

40. de los Santos CB, Brun FG, Bouma TJ, Vergara JJ, Perez-Llorens JL. Acclimation of seagrass *Zostera noltii* to co-occurring hydrodynamic and light stresses. *Mar Ecol Prog Ser*. 2010; 398: 127–135. <https://doi.org/10.3354/meps08343>.
41. Puijalon S, Bornette G. Phenotypic plasticity and mechanical stress: biomass partitioning and clonal growth of an aquatic plant species. *Am J Bot*. 2006; 93: 1090–1099. <https://doi.org/10.3732/ajb.93.8.1090> PMID: 21642174
42. Poorter H, Niklas KJ, Reich PB, Oleksyn J, Poot P, Mommer L. Biomass allocation to leaves, stems and roots: meta-analyses of interspecific variation and environmental control. *New Phytol*. 2012; 193: 30–50. <https://doi.org/10.1111/j.1469-8137.2011.03952.x> PMID: 22085245
43. Bruce TJA, Matthes MC, Napier JA, Pickett JA. Stressful "memories" of plants: Evidence and possible mechanisms. *Plant Sci*. 2007; 173: 603–608. <https://doi.org/10.1016/j.plantsci.2007.09.002>.
44. Iwasaki M, Paszkowski J. Epigenetic memory in plants. *EMBO J*. 2014; 33: 1987–1998. <https://doi.org/10.15252/embj.201488883> PMID: 25104823
45. Fleta-Soriano E, Munne-Bosch S. Stress memory and the inevitable effects of drought: a physiological perspective. *Front Plant Sci*. 2016; 7: 143. <https://doi.org/10.3389/fpls.2016.00143> PMID: 26913046
46. Hu T, Liu S-Q, Amombo E, Fu J-M. Stress memory induced rearrangements of HSP transcription, photosystem II photochemistry and metabolism of tall fescue (*Festuca arundinacea* Schreb.) in response to high-temperature stress. *Front Plant Sci*. 2015; 6: 403. <https://doi.org/10.3389/fpls.2015.00403>.
47. Menezes-Silva PE, Sanglard LMVP, Avila RT, Morais LE, Martins SCV, Nobres P, et al. Photosynthetic and metabolic acclimation to repeated drought events play key roles in drought tolerance in coffee. *J Exp Bot*. 2017; 68: 4309–4322. <https://doi.org/10.1093/jxb/erx211> PMID: 28922767
48. Byun Y-J, Koo M-Y, Joo H-J, Ha-Lee Y-M, Lee D-H. Comparative analysis of gene expression under cold acclimation, deacclimation and reacclimation in *Arabidopsis*. *Physiol Plantarum*. 2014; 152: 256–274. <https://doi.org/10.1111/ppl.12163>.
49. Hu T, Jin Y, Li H, Amombo E, Fu J. Stress memory induced transcriptional and metabolic changes of perennial ryegrass (*Lolium perenne*) in response to salt stress. *Physiol Plantarum*. 2016; 156: 54–69. <https://doi.org/10.1111/ppl.12342>.
50. Sasayama D, Ikemachi K, Sakai H, Fukayama H, Itoh K, Azuma T. Promotion of first internode elongation in perennial paddy weeds *Sagittaria trifolia* and *Sagittaria pygmaea* tubers by oxygen depletion and carbon dioxide. *Weed Biol Manag*. 2016; 16: 147–156. <https://doi.org/10.1111/wbm.12105>.
51. Schlüter U, Crawford RMM. Long-term anoxia tolerance in leaves of *Acorus calamus* L. and *Iris pseudacorus* L. *J Exp Bot*. 2001; 52: 2213–2225. <https://doi.org/10.1093/jexbot/52.364.2213> PMID: 11604461
52. Voesenek L, Bailey-Serres J. Flood adaptive traits and processes: an overview. *New Phytol*. 2015; 206: 57–73. <https://doi.org/10.1111/nph.13209> PMID: 25580769
53. Voesenek L, Rijnders J, Peeters AJM, Van de Steeg HMV, De Kroon H. Plant hormones regulate fast shoot elongation under water: From genes to communities. *Ecology*. 2004; 85: 16–27. <https://doi.org/10.1890/02-740>.
54. Li YK, Yu D, Huang YM. Effects of UV-B, nutrient, and light availability on shoot length and phenolic content of *Myriophyllum spicatum* (L.). *J Freshwater Ecol*. 2005; 20: 59–63. <https://doi.org/10.1080/02705060.2005.9664936>.
55. Roro AG, Dukker SAF, Melby TI, Solhaug KA, Torre S, Olsen JE. UV-B-induced inhibition of stem elongation and leaf expansion in pea depends on modulation of gibberellin metabolism and intact gibberellin signalling. *J Plant Growth Regul*. 2017; 36: 680–690. <https://doi.org/10.1007/s00344-017-9671-0>.
